1 **The role of environmental calcium in the extreme acid tolerance of northern banjo frog**  
2 **(*Limnodynastes terraereginae*) larvae**

3

4 Coen Hird<sup>1</sup>, Craig E. Franklin<sup>1</sup> and Rebecca L. Cramp<sup>1\*</sup>

5 <sup>1</sup>School of Biological Sciences, The University of Queensland, Brisbane, AUSTRALIA 4072

6

7 **Running title:** Calcium and acid tolerance in aquatic larvae

8

9 **Keywords:** amphibian, tadpole, low pH, wallum, epithelia, calcium transport

10

11 **Summary statement**

12 Tolerance of naturally acidic, dilute, and soft waters by larvae of the frog *Limnodynastes*  
13 *terraereginae* involves adaptations to the branchial calcium transport pathway which protects  
14 intercellular junctions against damage.

15

16 **\*Corresponding author:** [r.cramp@uq.edu.au](mailto:r.cramp@uq.edu.au)

17 CH, ORCID Id 0000-0001-9812-4818

18 RLC, ORCID Id 0000-0001-9798-2271

19 CEF, ORCID Id 0000-0003-1315-3797

20

21

22

23

24

25

## 26 ABSTRACT

27 Many aquatically respiring animals inhabiting low pH waters can suffer acute inhibition of ion  
28 uptake and loss of branchial (gill) epithelial integrity, culminating in a fatal, rapid loss of body  $\text{Na}^+$ .  
29 Environmental calcium levels ( $[\text{Ca}^{2+}]_e$ ) are pivotal in maintaining branchial junction integrity, with  
30 supplemental  $\text{Ca}^{2+}$  reversing the negative effects of low pH in some animals. Tolerance of some  
31 naturally acidic environments by aquatic animals is further complicated by low  $[\text{Ca}^{2+}]_e$ , yet many of  
32 these environments are surprisingly biodiverse. How these animals overcome the combined  
33 damaging actions of low pH and low environmental  $\text{Ca}^{2+}$  remains unknown. Here, we examined  
34 the effects of  $[\text{Ca}^{2+}]_e$  on the response to low pH in larvae of the highly acid tolerant frog  
35 *Limnodynastes terraereginae*. Acute exposure to low pH water in the presence of low  $[\text{Ca}^{2+}]_e$   
36 increased net  $\text{Na}^+$  efflux. Provision of additional  $[\text{Ca}^{2+}]_e$  reduced net  $\text{Na}^+$  efflux, but the effect was  
37 saturable. Acclimation to both low and high  $[\text{Ca}^{2+}]_e$  improved the resistance of larvae to  $\text{Na}^+$  efflux  
38 at low pH. Inhibition of apical  $\text{Ca}^{2+}$  uptake by ruthenium red resulted in an abrupt loss of tolerance  
39 to low pH in larvae acclimated to low pH water. Acclimation to acidic water increased branchial  
40 gene expression of the intracellular  $\text{Ca}^{2+}$  transport protein calbindin, consistent with a role for  
41 increased transcellular  $\text{Ca}^{2+}$  trafficking in the tolerance of acidic water. This study confirmed the  
42 physiological challenge of low  $[\text{Ca}^{2+}]_e$  on branchial integrity in acidic waters and highlighted a  
43 potential role for maintenance of transcellular  $\text{Ca}^{2+}$  uptake in the acid tolerance of *L.*  
44 *terraereginae*.

45

## 46 INTRODUCTION

47 Life in freshwater environments is complicated by the fact that animals are hyper-ionic  
48 with respect to the environment and ions tend to move out of the animal along their diffusion  
49 gradients. In order to offset ion losses, freshwater animals actively take up ions from the  
50 environment via specialised cells in the gills, integument (in larvae and embryos) and across the  
51 gut (Edwards and Marshall, 2012; Evans et al., 1999). The physiological challenges of living in  
52 freshwater environments can be further compounded by low pH. Most aquatically respiring  
53 animals are intolerant of water pH less than 5 (low pH). In many animals low pH water  
54 substantially impairs both ion uptake capacity and epithelial integrity, leading to a rapid loss of  
55 homeostasis that can be fatal (Freda and Dunson, 1984; McDonald et al., 1984; Meyer et al., 2010;  
56 Meyer et al., 2020; Robinson, 1993).

57           The effect of low pH water on branchial epithelial integrity drives its toxicity in many  
58 species. In acid-sensitive animals, exposure to low pH water reduces transepithelial resistance  
59 through the disruption of paracellular tight junctions (Daye and Garside, 1976; Meyer et al., 2010;  
60 Rosseland and Staurnes, 1994). Tight junctions (TJ) are composed of a complex of transmembrane  
61 and associated proteins which function in cell-cell adhesion and control epithelial permeability by  
62 acting as a selective barrier to ions and small molecules (Schneeberger and Lynch, 2004). In doing  
63 so, TJs regulate and maintain key transcellular ion gradients necessary to facilitate transepithelial  
64 ion uptake. Low extracellular pH has been shown to reduce the resistance of the paracellular  
65 pathway by changing the conformation of TJ proteins which alters their gating properties  
66 (Schneeberger and Lynch, 1992; Schneeberger and Lynch, 2004).

67           Environmental  $[Ca^{2+}]_e$  is essential to maintaining the integrity of the epithelial TJ  
68 (Schneeberger and Lynch, 1992). Increased  $[Ca^{2+}]_e$  has been shown to ameliorate the effects of  
69 low pH on epithelial integrity in some fish and amphibian species (Dalziel et al., 1986; Matsuo and  
70 Val, 2002; McDonald et al., 1983; Meyer et al., 2020). This may be because low  $[Ca^{2+}]_e$  causes  
71 dissociation of the paracellular junctions, increasing epithelial permeability (Bhat et al., 1993; Ma  
72 et al., 2000; O'Keefe et al., 1987). In some fishes and larval amphibians acutely exposed to low pH,  
73 elevated and reduced environmental  $Ca^{2+}$  levels substantially reduced and increased rates of  
74 passive net  $Na^+$  loss, respectively (Cummins, 1988; Freda et al., 1991; Gascon et al., 1987; Gonzalez  
75 and Dunson, 1989; Kumai et al., 2011; McDonald and Rogano, 1986; McDonald et al., 1983).  $Ca^{2+}$   
76 may act on the TJ directly, but also indirectly through  $Ca^{2+}$ -dependent proteins in adherens  
77 junctions (AJ) which sit basally to the TJ (Brown and Davis, 2002). Removal of  $Ca^{2+}$  from the  
78 extracellular space has been shown to reduce cytosolic  $[Ca^{2+}]_i$  (Gonzalez-Mariscal et al., 1990),  
79 cause the detachment and internalisation of extracellular AJ and TJ proteins (Volberg et al., 1986),  
80 and reduce transepithelial resistance (Gonzalez-Mariscal et al., 1990). Adherens junctions function  
81 primarily in cell-cell adhesion, but also the regulation of the actin cytoskeleton and as  
82 transcriptional regulators (Hartsock and Nelson, 2008). Extracellular  $Ca^{2+}$  can regulate paracellular  
83 permeability by interacting directly with calcium-dependent junctional proteins on the cell surface  
84 and/or through active transcellular  $Ca^{2+}$  uptake and cytosolic  $Ca^{2+}$  signalling pathways (Stuart et  
85 al., 1996). Although extracellular  $[Ca^{2+}]_e$  is important in determining the effects of low pH exposure  
86 in fish and amphibians, the specific mechanism through which this occurs remains unknown.

87           Transcellular uptake of  $Ca^{2+}$  from the surrounding water via the gills constitutes the major  
88 route by which  $Ca^{2+}$  is taken up in fish (Baldwin and Bentley, 1980; Chasiotis et al., 2012; Flik and

89 Verboost, 1995). Active branchial  $\text{Ca}^{2+}$  uptake occurs at ionocytes in the branchial epithelium (Fig.  
90 1). Extracellular  $\text{Ca}^{2+}$  enters ionocytes through non-voltage gated epithelial  $\text{Ca}^{2+}$  channels (ECaC) in  
91 the apical membrane (Edwards and Marshall, 2012; Flik and Verboost, 1995) and is then shuttled to  
92 the basolateral membrane by  $\text{Ca}^{2+}$  binding proteins such as calbindin for extrusion via  $\text{Na}^+$ - $\text{Ca}^{2+}$   
93 exchangers (NCX) and plasma membrane  $\text{Ca}^{2+}$  ATPase transporters (PMCA). Once in the  
94 basolateral extracellular space,  $\text{Ca}^{2+}$  can directly interact with the extracellular  $\text{Ca}^{2+}$  binding  
95 domain of E-cadherin in AJs to influence its properties and those of the overlying TJ (Pokutta et al.,  
96 1994; Zhang et al., 2009). Branchial  $\text{Ca}^{2+}$  absorption is tightly controlled through the regulation of  
97 ECaC activity and changes in the abundance of intracellular  $\text{Ca}^{2+}$  transport proteins (Cai et al.,  
98 1993; Kelly and Wood, 2008; Khanal and Nemere, 2008; Shahsavarani and Perry, 2006; Verboost et  
99 al., 1993; Wongdee and Charoenphandhu, 2013). This, in turn, may reduce the transcellular  
100 movement of  $\text{Ca}^{2+}$  to the basolateral extracellular space, which could limit its availability to E-  
101 cadherin in the AJ and compromise the permeability of the overlying TJ. Factors that compromise  
102 the maintenance of transcellular  $\text{Ca}^{2+}$  transport pathways could influence the  $\text{Ca}^{2+}$ -sensitive  
103 aspects of junctional stability.

104         Given that highly acidic water is toxic to most aquatic animals, naturally acidic freshwater  
105 bodies are surprisingly biodiverse. Among the most acidic freshwater ecosystems in the world is  
106 the Wallum along the eastern coast of southern Queensland and northern New South Wales in  
107 Australia. Wallum ecosystems are characterised by highly acidic waters, ranging from pH 2.8 – 5.5  
108 (Hines and Meyer, 2011). Compounding the difficulties of living at low pH, Wallum waters are also  
109 dilute (low in salts) and soft (low in  $\text{Ca}^{2+}$  and  $\text{Mg}^{2+}$ ; Bayly, 1964). Despite these challenges, larvae of  
110 some Wallum frog species can tolerate exceptionally acidic waters (Hines and Meyer, 2011;  
111 Meyer, 2004; Meyer et al., 2020). One such species is the northern banjo frog, *Limnodynastes*  
112 *terraereginae*, populations of which can be found throughout eastern Australia inhabiting aquatic  
113 environments which range in pH from circum-neutral to pH 3.0, making it one of the most highly  
114 acid tolerant vertebrate species known. Given that  $[\text{Ca}^{2+}]_e$  is limited in Wallum environments and  
115 that  $\text{Ca}^{2+}$  uptake is typically inhibited by low pH, understanding how amphibian larvae manage  
116  $\text{Ca}^{2+}$  transport in low pH water is likely central to understanding the mechanistic basis of their  
117 tolerance to these extreme environments.

118         To determine the importance of  $[\text{Ca}^{2+}]_e$  on  $\text{Na}^+$  homeostasis at low pH, we examined whole  
119 animal  $\text{Na}^+$  and  $\text{Ca}^{2+}$  fluxes following both acute and chronic exposure to low pH and different  
120  $[\text{Ca}^{2+}]_e$  in *L. terraereginae* larvae. To understand the role of transcellular  $\text{Ca}^{2+}$  uptake for the

121 maintenance of epithelial integrity at low pH, *L. terraereginae* larvae reared at low pH were  
122 exposed to the calcium channel antagonist, ruthenium red (RR). We also measured gene  
123 expression patterns of four key  $\text{Ca}^{2+}$  transport proteins (ECaC, calbindin, NCX, and PMCA) and E-  
124 cadherin in the gill epithelia. We hypothesised that acute exposure to low pH would result in  
125 increased net  $\text{Na}^+$  efflux under low  $[\text{Ca}^{2+}]_e$ , but that chronic exposure (acclimation) to low  $[\text{Ca}^{2+}]_e$   
126 would reduce net  $\text{Na}^+$  efflux with low pH exposure and increase  $\text{Ca}^{2+}$  influx. In addition, we  
127 hypothesised that the acute impairment of apical  $\text{Ca}^{2+}$  uptake via ECaC (with RR) would increase  
128 net efflux of  $\text{Na}^+$  at low pH consistent with a role for transcellular  $\text{Ca}^{2+}$  transport in the  
129 maintenance of intercellular junction integrity. Finally, acclimation to both low pH and low  $[\text{Ca}^{2+}]_e$   
130 was hypothesised to correspond to an increase in the expression of the four key  $\text{Ca}^{2+}$  transporters  
131 (ECaC, calbindin, NCX, and PMCA) and E-cadherin consistent with an increased rate of transcellular  
132  $\text{Ca}^{2+}$  uptake and reinforcement of  $\text{Ca}^{2+}$ -dependent AJs to protect junctional integrity in acid-  
133 acclimated larvae.

134

## 135 **MATERIALS AND METHODS**

### 136 *Experimental animals and general methods*

137 All animals were collected under the Queensland Department of Environment and Heritage  
138 Protection Scientific Purposes Permit (WITK15563515), and all procedures were approved by The  
139 University of Queensland's Animal Ethics Welfare Unit (SBS/484/17). *Limnodynastes terraereginae*  
140 egg masses were collected in January 2018 from Bribie Island National Park, Queensland. Eggs  
141 were allocated to circumneutral (pH 6.5) or low (pH 3.5) pH artificial soft water (ASW; Freda 1984);  
142 distilled water plus (in  $\mu\text{mol L}^{-1}$ ) 40  $\text{CaCl}_2 \cdot 2\text{H}_2\text{O}$ , 40  $\text{MgSO}_4 \cdot 7\text{H}_2\text{O}$ , 120 NaCl, 50 NaOH, 20 KCl; pH  
143 was adjusted with 0.1 M  $\text{H}_2\text{SO}_4$ ). Hatched tadpoles were housed in 5 L plastic tanks connected to  
144 two 200 L filtered recirculating aquarium systems (15 tanks per system). Each system was  
145 connected to a canister filter for biological, mechanical, and chemical filtration (Fluval G6, City,  
146 Country). System pH was monitored daily (LAQUA P-22, Horiba Instruments, Singapore) and  
147 regulated as necessary through the addition of 0.1 M  $\text{H}_2\text{SO}_4$ . Water  $[\text{Na}^+]_e$  and  $[\text{Ca}^{2+}]_e$  was  
148 measured weekly using flame photometry (BWB Technologies, Berkshire, UK). Tadpoles were fed  
149 every second day with thawed frozen spinach, and each system underwent a 20% water change  
150 weekly. Room temperature was maintained at  $22 \pm 1^\circ\text{C}$  with fluorescent overhead lighting

151 programmed to a 12L:12D photoperiod (6:00 – 18:00). The following experiments were replicated  
152 once within the laboratory.

### 153 *Whole animal Na<sup>+</sup> and Ca<sup>2+</sup> fluxes*

154 The Na<sup>+</sup> and Ca<sup>2+</sup> concentration ( $\mu\text{mol L}^{-1}$ ) in water samples was measured using a flame  
155 photometer (BWB Technologies, Berkshire, UK). Na<sup>+</sup> and Ca<sup>2+</sup> detection ranges were calibrated  
156 using (in  $\mu\text{mol L}^{-1}$ ) 5, 50, 500, and 1000 standards. To buffer potential spectral interference of  
157 sulphites and phosphates on Ca<sup>2+</sup> readings, 50  $\mu\text{mol L}^{-1}$  [Ca<sup>2+</sup>]<sub>e</sub> samples were diluted to 50% and  
158 250  $\mu\text{mol L}^{-1}$  [Ca<sup>2+</sup>]<sub>e</sub> samples were diluted to 25% (Thiers and Hviid, 1962; Welch et al., 1990).  
159 Water samples containing 5  $\mu\text{mol L}^{-1}$  [Ca<sup>2+</sup>]<sub>e</sub> were under the limit of detectability for our flame  
160 photometer and Ca<sup>2+</sup> fluxes were unable to be reliably measured in this treatment; Na<sup>+</sup>  
161 concentrations remained within the limits of detectability for all [Ca<sup>2+</sup>]<sub>e</sub> exposures and were  
162 recorded for all treatments. All net Na<sup>+</sup> and Ca<sup>2+</sup> flux measures (in  $\text{nmol L}^{-1} \text{h}^{-1}$ ) were calculated by  
163 comparing changes in water [Na<sup>+</sup>] and [Ca<sup>2+</sup>] over the exposure period as follows:

$$164 \quad \text{Net ion flux} = \left( \frac{\text{Initial [ion]} - \text{Final [ion]}}{t} \right), \text{ Eqn 3}$$

165 where  $t$  (in  $\text{h}^{-1}$ ) is the time of the exposure period in hours (6).

166

### 167 *Effects of acute exposure to high or low Ca<sup>2+</sup> levels on whole animal net Na<sup>+</sup> and Ca<sup>2+</sup> fluxes at low* 168 *pH (experiment 1).*

169 To assess the effect of acute exposure to high or low [Ca<sup>2+</sup>]<sub>e</sub> on acid-induced net Na<sup>+</sup> and  
170 Ca<sup>2+</sup> fluxes, *L. terraereginae* larvae (n = 36; Gosner stages 26-38; Gosner, 1960) were randomly  
171 allocated to three 5 L tanks (n ≤ 12 per tank to obtain adequate statistical power, based off  
172 previous ion flux work with the species in Meyer et al. 2004) containing 50  $\mu\text{mol L}^{-1}$  [Ca<sup>2+</sup>]<sub>e</sub> ASW  
173 (Table 1). Water pH was maintained at pH 6.5 and larvae were acclimated to these conditions for 4  
174 weeks. Water pH was monitored daily and regulated as necessary via addition of 0.1 M H<sub>2</sub>SO<sub>4</sub>.  
175 Tadpoles were fed every second day with thawed frozen spinach, and each system underwent a  
176 100% water change weekly. Ammonia levels were monitored using an API® Ammonia Test Kit  
177 (Mars Fishcare, Chalfont, PA). Larvae were then placed into individual 200 ml glass beakers  
178 containing 50 ml of either 5  $\mu\text{mol L}^{-1}$  [Ca<sup>2+</sup>]<sub>e</sub>, 50  $\mu\text{mol L}^{-1}$  [Ca<sup>2+</sup>]<sub>e</sub> or 250  $\mu\text{mol L}^{-1}$  [Ca<sup>2+</sup>]<sub>e</sub> ASW (n = 12  
179 per treatment) 30 minutes prior to testing. Water pH in half of the beakers in each treatment (n =  
180 6) was acutely lowered to pH 3.5 through the addition of dilute H<sub>2</sub>SO<sub>4</sub> (0.1M) . A 5 ml water

181 sample was collected from all beakers 1- and 7-hours following pH adjustment for the  
182 measurement of  $\text{Na}^+$  and  $\text{Ca}^{2+}$  concentrations. Net ion fluxes were determined by subtracting the  
183 ion concentrations at the start of the exposure (1 h sample) from those at the end (7 h sample).  
184 Following experimentation, all larvae were lightly blotted dry, weighed and returned to their  
185 holding tanks.

186

187 *Effects of chronic exposure to high or low  $\text{Ca}^{2+}$  levels on whole animal  $\text{Na}^+$  and  $\text{Ca}^{2+}$  fluxes at low pH*  
188 *(experiment 2).*

189 To assess the effect of chronic exposure (acclimation) to high or low  $[\text{Ca}^{2+}]_e$  on whole  
190 animal net  $\text{Na}^+$  and  $\text{Ca}^{2+}$  fluxes following acute exposure to low pH, *L. terraereginae* larvae (n = 24;  
191 Gosner stages 26-38) were transferred to tanks containing either 5 or 250  $\mu\text{mol L}^{-1}$   $[\text{Ca}^{2+}]_e$  ASW  
192 four weeks prior to sampling. Control larvae were maintained in 50  $\mu\text{mol L}^{-1}$  ASW. Thirty minutes  
193 prior to testing, larvae were placed into individual 200 ml glass beakers containing 50 ml of ASW  
194 containing the same  $[\text{Ca}^{2+}]_e$  as their holding tanks (n = 12 per treatment). Water pH in the beakers  
195 in each treatment was then acutely lowered to pH 3.5 through the addition of 0.1M  $\text{H}_2\text{SO}_4$ . Water  
196 samples were then collected from all beakers at 1 h and 7 h and analysed as detailed above for  
197  $\text{Na}^+$  and  $\text{Ca}^{2+}$  concentrations.

198

199 *Effects of  $\text{Ca}^{2+}$  uptake inhibition on whole animal  $\text{Na}^+$  and  $\text{Ca}^{2+}$  fluxes acclimated to low pH*  
200 *(experiment 3).*

201 Ruthenium red was used to inhibit apical  $\text{Ca}^{2+}$  transport since it does not penetrate TJs and  
202 is commonly used as a histochemical marker of the barrier formed by epithelial TJs (González-  
203 Mariscal et al., 1989; West et al., 2002). *L. terraereginae* larvae (n = 12; Gosner stages 26-38) were  
204 randomly allocated to an isolated 5 L tank containing 50  $\mu\text{mol L}^{-1}$   $[\text{Ca}^{2+}]_e$  ASW at pH 3.5 and  
205 maintained for four weeks as detailed in experiment 1. Thirty minutes prior to testing, larvae (n =  
206 12) were placed into individual 200 ml glass beakers containing 50 ml of 50  $\mu\text{mol L}^{-1}$   $[\text{Ca}^{2+}]_e$  ASW at  
207 pH 3.5. Ruthenium red was added to half of the beakers to a concentration proven to induce an  
208 approximately half-maximal response in ECaC activity *in vitro* (10  $\mu\text{mol L}^{-1}$ ; Hoenderop et al.,  
209 2001). Water samples were collected at 1 and 7 h post exposure and analysed as described above.  
210 Larvae were then removed from beakers, blotted dry and weighed.

211

212 *Gene expression of Ca<sup>2+</sup> transport and adherens junction proteins*

213 To assess whether [Ca<sup>2+</sup>]<sub>e</sub> exposure and low pH influences the expression of branchial Ca<sup>2+</sup>  
214 transport proteins and E-cadherin, *L. terraereginae* larvae (n = 36; Gosner stages 26-38) were  
215 randomly allocated to six isolated 5 L tanks (n = 6 per tank) containing 5, 50, and 250 μmol L<sup>-1</sup>  
216 [Ca<sup>2+</sup>]<sub>e</sub> ASW. Water pH was maintained at pH 6.5 (n = 18) or reduced to pH 3.5 (n = 18). Larvae  
217 were maintained under these conditions for four weeks. *L. terraereginae* larvae were then  
218 euthanised by immersion in 0.25 mg L<sup>-1</sup> buffered MS222 (Ramlochansingh et al., 2014), and  
219 pithing. Both branchial baskets were dissected free and stored in RNAlater (Ambion Inc.) at 4°C for  
220 24 hours, before being moved into a -20°C freezer. Total RNA was extracted from *L. terraereginae*  
221 gills using a RNeasy Mini Kit following the manufacturer's instructions (Qiagen, Valencia, CA). Total  
222 RNA was eluted from the silicon spin column in ultrapure water and its concentration quantified  
223 using a Qubit fluorometer (ThermoFisher Scientific, Waltham, USA). Any residual genomic DNA  
224 contamination was removed, and RNA was reverse transcribed using an iScript gDNA Clear cDNA  
225 Synthesis Kit (Bio-Rad, Hercules, CA) following the manufacturers guidelines. Appropriate no  
226 reverse transcriptase controls were generated by replacing reverse transcriptase with water.

227 The transcripts for target genes (ECaC, Calb1, PMCA, NCX, E-Cadherin) and house-keeping  
228 genes (β-actin, GAPDH, RPS, TUB) were identified using an in-house *L. terraereginae* transcriptome  
229 using homologous sequences from other amphibians as the reference query. Reference sequences  
230 were compared against the *L. terraereginae* transcriptome using the 'blastn' tool in Galaxy  
231 Australia (Jalili et al., 2020). Putative *L. terraereginae* gene sequences were then compared against  
232 the National Centre for Biotechnology Information (NCBI) database using the 'blastn' tools default  
233 parameters to confirm their identity. PrimerQuest (Integrated DNA Technologies, Caraville, IA) was  
234 used to design specific qPCR primers (Table S1). All primer pairs were evaluated for specificity and  
235 to ensure that they produced only a single band of the appropriate length using MyTaq DNA  
236 Polymerase (Bioline, Alexandria, NSW, Australia) and agarose gel electrophoresis.

237 Quantitative PCR assays were conducted using iTaq™ Universal SYBR® Green Supermix  
238 (Bio-rad, Hercules, CA) in a Mini Opticon detection system (MJ Mini Cycler; Bio-rad Laboratories  
239 Inc., Hercules, CA). Samples were analysed in triplicate and each plate included appropriate no  
240 template controls. No reverse transcriptase controls were assessed independently for each  
241 biological sample to confirm the absence of genomic DNA contamination. Cycling parameters



242 were as follows: 95°C for 1 min followed by 40 cycles of 95°C for 15 sec and 60°C for 30 sec. Melt  
243 (dissociation) curves (65-90°C) were conducted after each run. Reaction efficiencies were  
244 calculated using a serially diluted pooled cDNA standard. All PCR efficiencies were greater than  
245 90% with an R<sup>2</sup> of over 0.99. All assays produced unique and single peak dissociation curves. Data  
246 were exported to MS Excel using Bio-Rad CFX Manager (version 3.1, Bio-Rad). The stability of the  
247 candidate house-keeping genes was calculated using the geNorm algorithm via the *NormqPCR*  
248 package (Perkins et al., 2012). All four genes were found to be highly stable across the six  
249 treatment groups and met the criteria for designation as appropriate housekeeping genes. A  
250 combination of housekeeping genes was used as a pseudo-housekeeper (Rocha-Martins et al.,  
251 2012; Vandesompele et al., 2002). The geNorm algorithm revealed the two most stable  
252 housekeeping genes (GAPDH and RPS) combined were an effective housekeeping control. To  
253 combine the housekeeping genes, the geometric mean of the raw amplification threshold (Ct)  
254 values and the reaction efficiencies for GAPDH and RPS were calculated for use in analyses. The  
255 following calculations for target gene expression were conducted following Pfaffl (2001). To  
256 account for differing reaction efficiencies between primers, adjusted Ct values for the pseudo-  
257 housekeeper and the genes of interest were calculated using the following formula:

$$Ct_{adjusted} = \log_2(E^{Ct}), \text{Eqn 2}$$

258 where  $E$  is the reaction efficiency for the gene and  $Ct$  is the raw Ct value of the sample. Delta ( $\Delta$ ) Ct  
259 was calculated for each sample for statistical analyses:

$$\Delta Ct_{sample} = Ct_{adjusted}(GOI) - Ct_{adjusted}(HKG), \text{Eqn 3}$$

260 where  $Ct_{adjusted}(GOI)$  are the adjusted Ct values for the gene of interest, and  $Ct_{adjusted}(HKG)$  are the  
261 adjusted Ct values for the combined housekeeping genes.  $\Delta Ct$  in each target gene was quantified  
262 as fold-change relative to the expression of a reference group (the 50  $\mu\text{mol L}^{-1}$   $[\text{Ca}^{2+}]_e$  at pH 6.5  
263 group).

264

### 265 *Statistical analyses*

266 All analyses were conducted in the R statistical environment (R Computing Team, 2021).  $\alpha$   
267 was set at 0.05 for all statistical tests. Models were two-tailed and assumed a Gaussian error  
268 structure and data satisfied assumptions of hypothesis tests. The effects of body size on rates of  
269 ion flux were accounted for by considering wet body mass as a covariate in statistical models.

270 Differences in net  $\text{Na}^+$  and  $\text{Ca}^{2+}$  flux between treatment groups were tested by fitting  
271 analysis of covariance (ANCOVA) models using the *car* package (Fox and Weisberg, 2018). For  
272 experiment 1, a two-way ANCOVA was fitted using exposure  $[\text{Ca}^{2+}]_e$  and test pH as independent  
273 variables. To determine whether acclimation to low or high  $\text{Ca}^{2+}$  affected  $\text{Na}^+$  and  $\text{Ca}^{2+}$  fluxes at  
274 low pH in experiment 2, larvae reared at  $50 \mu\text{mol L}^{-1} [\text{Ca}^{2+}]_e$  and exposed to low pH at 5 and 250  
275  $\mu\text{mol L}^{-1} [\text{Ca}^{2+}]_e$  from experiment 1 were compared with larvae reared at 5 or 250  $\mu\text{mol L}^{-1} [\text{Ca}^{2+}]_e$   
276 and exposed to low pH at 5 and 250  $\mu\text{mol L}^{-1} [\text{Ca}^{2+}]_e$ . A two-way ANCOVA was fitted modelling test  
277  $[\text{Ca}^{2+}]_e$  and rearing  $[\text{Ca}^{2+}]_e$  (equimolar to test  $[\text{Ca}^{2+}]_e$  versus 50  $\mu\text{mol L}^{-1} [\text{Ca}^{2+}]_e$  control) as  
278 independent variables. For experiment 3, a one-way ANCOVA was fitted with RR treatment as the  
279 independent variable. For all experiments, one-sample Student's t-tests were used to test if  $\text{Na}^+$   
280 and  $\text{Ca}^{2+}$  fluxes in control groups were significantly different from zero suggesting a departure  
281 from homeostasis. Net  $\text{Na}^+$  and  $\text{Ca}^{2+}$  fluxes were assessed in separate models. *Post hoc* analyses  
282 for all ion flux experiments were conducted with the *emmeans* package (Lenth, 2022) using the  
283 Tukey method of *p* value adjustment for multiple comparisons. All data reported are estimated  
284 marginal means adjusted for the effect of the covariate.

285 Differences in target gene expression between treatment groups was analysed by  
286 comparing  $\Delta\text{Ct}$  values in analysis of variance models using the *car* package (Fox and Weisberg,  
287 2018). A two-way analysis of variance model was fitted using acclimation  $[\text{Ca}^{2+}]_e$  and pH as  
288 independent variables. This model was fitted for all genes of interest. *Post hoc* analyses were  
289 conducted using Tukey's Honestly Significant Difference test for multiple comparisons.

290

## 291 RESULTS

### 292 *Effect of acute $[\text{Ca}^{2+}]_e$ exposure on $\text{Na}^+$ and $\text{Ca}^{2+}$ fluxes at low pH*

293 Baseline net  $\text{Na}^+$  and  $\text{Ca}^{2+}$  fluxes in control larvae (pH 6.5,  $50 \mu\text{mol L}^{-1} [\text{Ca}^{2+}]_e$  acclimated) at  
294 pH 6.5 were close to zero, although there was a small but significant net loss of  $\text{Na}^+$  ( $T_5 = -5.21$ ,  $p <$   
295  $0.01$ ; Fig. 2). Net  $\text{Ca}^{2+}$  fluxes in control larvae were not significantly different from zero. There was  
296 a significant interaction between pH and  $[\text{Ca}^{2+}]_e$  on net  $\text{Na}^+$  efflux in *L. terraereginae* larvae ( $F_{29,2} =$   
297  $6.18$ ,  $p < 0.01$ ). Irrespective of  $[\text{Ca}^{2+}]_e$ , all larvae exposed acutely to pH 3.5 water experienced a  
298 substantial net loss of  $\text{Na}^+$  indicating that  $\text{Na}^+$  efflux rates were considerably higher than  $\text{Na}^+$   
299 uptake rates. The magnitude of the effect of acute low pH exposure on  $\text{Na}^+$  flux was greatest in  
300 larvae exposed to  $5 \mu\text{mol L}^{-1} [\text{Ca}^{2+}]_e$ . There was less effect of low pH on  $\text{Na}^+$  efflux in larvae

301 exposed to  $50 \mu\text{mol L}^{-1}$  ( $t_{29} = 3.2$ ,  $p < 0.01$ ) and  $250 \mu\text{mol L}^{-1}$   $[\text{Ca}^{2+}]_e$  ( $t_{29} = 2.56$ ,  $p = 0.041$ ). There  
302 was no effect of pH or  $[\text{Ca}^{2+}]_e$  on net  $\text{Ca}^{2+}$  fluxes.

303

#### 304 *Effect chronic $[\text{Ca}^{2+}]_e$ exposure on $\text{Na}^+$ and $\text{Ca}^{2+}$ fluxes at low pH*

305 Relative to larvae simultaneously exposed to low pH and acute alterations to  $[\text{Ca}^{2+}]_e$ , 4-  
306 weeks of acclimation to both low and high calcium levels reduced the impact of acute low pH  
307 exposure on net  $\text{Na}^+$  fluxes ( $F_{19,1} = 9.59$ ,  $p < 0.01$ ; Fig. 3). Similarly, there was a significant effect of  
308 acclimation to  $250 \mu\text{mol L}^{-1}$   $[\text{Ca}^{2+}]_e$  on net  $\text{Ca}^{2+}$  fluxes, with larvae acclimated to high  $[\text{Ca}^{2+}]_e$   
309 experiencing a significant net  $\text{Ca}^{2+}$  influx (compared with larvae in  $50 \mu\text{mol L}^{-1}$   $[\text{Ca}^{2+}]_e$ ) ( $F_{19,1} =$   
310  $12.56$ ,  $p < 0.01$ ).

311

#### 312 *Effect of the inhibition of apical $\text{Ca}^{2+}$ uptake on $\text{Na}^+$ and $\text{Ca}^{2+}$ fluxes in larvae acclimated to low pH*

313 In *L. terraereginae* larvae reared from hatching at pH 3.5 and with  $50 \mu\text{mol L}^{-1}$   $[\text{Ca}^{2+}]_e$  ASW,  
314 baseline net  $\text{Na}^+$  efflux was small but significantly lower than zero ( $T_5 = -4.1833$ ,  $p < 0.01$ ; Fig. 4).  
315 Larvae had a baseline net  $\text{Ca}^{2+}$  influx that was slightly but significantly higher than zero ( $T_5 =$   
316  $2.7916$ ,  $p = 0.038$ ). Acute exposure of *L. terraereginae* larvae to ruthenium red resulted in a  
317 substantial increase in both net  $\text{Na}^+$  efflux ( $F_{9,1} = 71.174$ ,  $p < 0.001$ ) and net  $\text{Ca}^{2+}$  efflux ( $F_{9,1} =$   
318  $38.14$ ,  $p < 0.001$ ) over the 6 h exposure period.

319

#### 320 *Gene expression*

321 The expression of key  $\text{Ca}^{2+}$  transport proteins and E-cadherin in the gills of *L. terraereginae*  
322 was compared across larvae reared at pH both 6.5 and pH 3.5 in low, moderate or high  $[\text{Ca}^{2+}]_e$ .  
323 There was no significant effect of acclimation pH or  $[\text{Ca}^{2+}]_e$  on the gene expression of branchial  
324 ECaC, PMCA, or NCX channels (Fig. 5). However, branchial calbindin expression was significantly  
325 higher in larvae reared at pH 3.5 than in pH 6.5-reared larvae ( $F_{1,24} = 5.640$ ,  $p = 0.026$ ) but was not  
326 influenced by  $[\text{Ca}^{2+}]_e$ . Branchial E-cadherin mRNA expression was significantly higher in larvae  
327 reared under high  $[\text{Ca}^{2+}]_e$  levels ( $F_{2,24} = 5.177$ ,  $p = 0.0135$ ) but was unaffected by acclimation pH.

328

329

## 330 DISCUSSION

331 Highly acidic waters pose a major threat to transcellular  $\text{Ca}^{2+}$  uptake pathways, which may  
332 play a role in the acute and potentially fatal branchial  $\text{Na}^+$  loss experienced by acid-sensitive  
333 aquatic animals exposed to low pH. Conversely, acid tolerant animals may employ a suite of  
334 mechanisms that enable them to protect  $\text{Ca}^{2+}$  uptake capacity which in turn allows them to resist  
335 the negative effects of low pH on junctional integrity. Consistent with our hypothesis, acute  
336 exposure to low pH water in the presence of low  $[\text{Ca}^{2+}]_e$  increased net  $\text{Na}^+$  efflux, but not net  $\text{Ca}^{2+}$   
337 fluxes in acid-tolerance *L. terraereginae* larvae. Provision of additional  $[\text{Ca}^{2+}]_e$  reduced net  $\text{Na}^+$   
338 efflux rates, but this effect was saturable. Acclimation to both low and high  $[\text{Ca}^{2+}]_e$  improved the  
339 resistance of larvae to  $\text{Na}^+$  efflux at low pH and resulted in an increased net  $\text{Ca}^{2+}$  influx. Inhibition  
340 of apical epithelial calcium uptake by ruthenium red resulted in the complete loss of tolerance to  
341 low pH in larvae acclimated to low pH water consistent with our hypothesis that acclimation to  
342 low pH involves the protection of  $\text{Ca}^{2+}$  uptake capacity. Acclimation to low pH water increased  
343 branchial gene expression of the intracellular  $\text{Ca}^{2+}$  transport protein calbindin, consistent with a  
344 role for increased transcellular  $\text{Ca}^{2+}$  trafficking in the tolerance of low pH water. These results  
345 establish a significant role for the security of  $\text{Ca}^{2+}$  uptake capacity in the tolerance of *L.*  
346 *terraereginae* larvae living in highly acidic waters.

347 Acid-naive *L. terraereginae* larvae reared at circumneutral pH and acutely exposed to low  
348 pH had a greater rate of net  $\text{Na}^+$  efflux than larvae reared and tested at pH 6.5, consistent with an  
349 acute negative effect of low pH on intercellular junction integrity. The high rate of net  $\text{Na}^+$  efflux  
350 was substantially reduced in animals acclimated to low pH consistent with an acid-tolerant  
351 phenotype. In acid-naïve *L. terraereginae*, the high rate of net  $\text{Na}^+$  efflux was exacerbated in the  
352 presence of low  $[\text{Ca}^{2+}]_e$ , indicating a protective effect of  $[\text{Ca}^{2+}]_e$  on epithelial junction integrity. This  
353 is consistent with previous studies showing that  $[\text{Ca}^{2+}]_e$  plays a significant role in determining  $\text{Na}^+$   
354 efflux rates with low pH exposure in a range of fish and amphibian larvae (Cummins, 1988; Freda  
355 and Dunson, 1984; Freda et al., 1991; Gascon et al., 1987; Gonzalez and Dunson, 1989; Gonzalez et  
356 al., 1998; Kullberg et al., 1993; Kumai et al., 2011; McDonald and Rogano, 1986; McDonald et al.,  
357 1983; Meyer et al., 2010; Riesch et al., 2015). However, environmental  $\text{Ca}^{2+}$  was only beneficial for  
358 controlling  $\text{Na}^+$  efflux up to a point: exposure of larvae to  $250 \mu\text{mol L}^{-1} [\text{Ca}^{2+}]_e$  did not further  
359 reduce net  $\text{Na}^+$  fluxes beyond that of larvae exposed to control ( $50 \mu\text{mol L}^{-1}$ ) levels. This may  
360 indicate the influence of elevated  $\text{Ca}^{2+}$  on  $\text{Na}^+$  efflux is saturable, and  $50 \mu\text{mol L}^{-1} [\text{Ca}^{2+}]_e$   
361 completely saturates the gill epithelium. This is consistent with Meyer (2004) who demonstrated

362 that  $80 \mu\text{mol L}^{-1} [\text{Ca}^{2+}]_e$  reduced  $\text{Na}^+$  efflux during low pH exposure in *L. terraereginae* larvae,  
363 however raising  $[\text{Ca}^{2+}]_e$  to  $400 \mu\text{mol L}^{-1}$  had no further effects.

364 The protective effect of  $[\text{Ca}^{2+}]_e$  on branchial junction permeability has been attributed to  
365 extracellular  $\text{Ca}^{2+}$  bound to the gill epithelium, specifically to the TJ (Freda and McDonald, 1988;  
366 Gonzalez and Dunson, 1989; McDonald, 1983; McWilliams, 1983; Reid et al., 1991; Yu et al., 2010).  
367 However, these studies did not account for the possibility that low pH affects junctional stability  
368 by impairing transcellular  $\text{Ca}^{2+}$  uptake pathways. Exposure of *L. terraereginae* larvae to water  
369 containing  $10 \mu\text{mol L}^{-1}$  of ruthenium red, a potent ECaC channel inhibitor (Nilius et al., 2001),  
370 resulted in a large ( $7500 - 17500 \text{ nmol h}^{-1}$ ) increase in net  $\text{Na}^+$  efflux. This suggests that the  
371 inhibition of the transcellular  $\text{Ca}^{2+}$  uptake pathway has an immediate and severe effect on  
372 junctional stability leading to increased junctional permeability to  $\text{Na}^+$ . Similar findings have been  
373 observed in studies of goldfish and tetras exposed to  $\text{La}^{3+}$ , a  $\text{Ca}^{2+}$  analogue that, unlike ruthenium  
374 red, also has the capacity to penetrate TJs and interact with AJs directly (Eddy and Bath, 1979;  
375 Gonzalez et al., 1997; Lacaz-Vieira and Marques, 2004). The inhibition of transcellular  $\text{Ca}^{2+}$  uptake  
376 using ruthenium red has not been performed previously on whole animals but does show that  
377 inhibition of  $\text{Ca}^{2+}$  uptake can have catastrophic impacts on homeostasis consistent with the loss of  
378 junctional stability. We posit that the inhibition of apical  $\text{Ca}^{2+}$  uptake disrupts AJ stability with  
379 consequences for the maintenance of TJ stability. Since ECaC activity is inhibited by low pH  
380 (Vennekens et al., 2001), we propose that a loss of  $\text{Ca}^{2+}$  uptake capacity following acute exposure  
381 to low pH may underpin the loss of junctional stability and resulting  $\text{Na}^+$  efflux in acid sensitive  
382 organisms. Conversely, adaptations which counter ECaC inhibition at low pH may protect  $\text{Ca}^{2+}$   
383 uptake capacity in acidophilic species. While the effects of ruthenium red on  $\text{Na}^+$  efflux in acid-  
384 acclimated larvae were rapid and extreme, an investigation of its effects on junctional morphology  
385 would be needed to demonstrate that high  $\text{Na}^+$  losses were the result of junctional disruption and  
386 not the inhibition of other  $\text{Na}^+$  and  $\text{Ca}^{2+}$  transport pathways. While ruthenium red is a potent  
387 inhibitor of ECaC, it can also affect other  $\text{Ca}^{2+}$  transport proteins which may affect the  
388 maintenance of ion balance (Hajnóczky et al., 2006; Vincent and Duncton, 2011).

389 Unlike  $\text{Na}^+$  fluxes, acute exposure to low pH water did not affect net  $\text{Ca}^{2+}$  fluxes when  
390 larvae were acutely exposed to high or control  $[\text{Ca}^{2+}]_e$ . In both circumneutral and low pH water,  
391  $\text{Ca}^{2+}$  fluxes were not significantly different from zero suggesting that rates of influx and efflux were  
392 balanced. This was unexpected as low pH has been shown to inhibit  $\text{Ca}^{2+}$  uptake (ECaC activity) in  
393 multiple cell lines (Bindels et al., 1994; Hoenderop et al., 1999; Vennekens et al., 2001). If low pH

394 also inhibited ECaC activity in *L. terraereginae*, it should have manifested as a net increase in the  
395 rate of  $\text{Ca}^{2+}$  loss. In fact, *L. terraereginae* larvae reared in high  $[\text{Ca}^{2+}]_e$  and acutely exposed to low  
396 pH experienced a net  $\text{Ca}^{2+}$  influx (approx.  $250 \text{ nmol h}^{-1}$ ) compared to animals reared at control  
397  $[\text{Ca}^{2+}]_e$  levels. In low pH reared larvae, there was an apparent net increase in  $\text{Ca}^{2+}$  uptake. These  
398 influxes strongly suggests that ECaC in the branchial epithelium of *L. terraereginae* larvae is not  
399 substantially inhibited by protonation, and that transcellular environmental  $\text{Ca}^{2+}$  uptake is  
400 maintained at low pH and may play a role in facilitating acid tolerance in *L. terraereginae*. This may  
401 highlight an adaptation for the prevention of  $\text{Ca}^{2+}$  uptake inhibition at low pH and could be linked  
402 to the expression of a less pH sensitive ECaC isoform. Consistent with this hypothesis, inhibition of  
403 apical  $\text{Ca}^{2+}$  uptake by ruthenium red did result in a large increase in net  $\text{Ca}^{2+}$  efflux in larvae.  
404 Clearly, the disturbance of transcellular  $\text{Ca}^{2+}$  uptake has serious implications for the maintenance  
405 of transepithelial resistance via the loss of junction stability at low pH.

406         The maintenance of transcellular  $\text{Ca}^{2+}$  transport is potentially important in promoting acid  
407 tolerance of acidophilic animals.  $\text{Ca}^{2+}$  might influence tolerance of low pH via association with the  
408  $\text{Ca}^{2+}$ -dependent AJ, which is directly responsible for the stability of the TJ and thus epithelial  
409 permeability, a major factor in preventing  $\text{Na}^+$  at low pH in acidophilic species (Gumbiner et al.,  
410 1988; Kwong et al., 2014; Watabe-Uchida et al., 1998). Lowering intracellular  $[\text{Ca}^{2+}]_i$  in MDCK cells  
411 has been shown to interfere with the formation of TJs (Stuart et al., 1996).  $\text{Ca}^{2+}$  also employs many  
412 signalling functions such as hormone regulation (Clapham, 2007; D'Souza-Li, 2006), which may  
413 potentially alter the expression of genes involved in maintaining junctional integrity at low pH.  
414 Calbindin and other intracellular  $\text{Ca}^{2+}$ -binding proteins function to buffer intracellular  $\text{Ca}^{2+}$   
415 concentrations by facilitating the basolateral extrusion of  $\text{Ca}^{2+}$  taken up across the apical  
416 membrane (Christakos et al., 1989). The finding that calbindin mRNA was upregulated in pH 3.5  
417 reared *L. terraereginae* larvae is suggestive of increased transcellular  $\text{Ca}^{2+}$  movements in the gill  
418 epithelium of *L. terraereginae* larvae acclimated to low pH. Interestingly, cytosolic  $\text{Ca}^{2+}$  is critical in  
419 regulating ECaC activity (Hoenderop et al., 1999). This finding is consistent with the idea that  
420 transcellular  $\text{Ca}^{2+}$  transport is involved in acid tolerance to some degree and that  $\text{Ca}^{2+}$  uptake is not  
421 inhibited by low pH in *L. terraereginae* larvae.

422         In contrast to our hypotheses, mRNA expression of key transcellular  $\text{Ca}^{2+}$  transport proteins  
423 ECaC, NCX and PMCA were not influenced by environmental pH or  $[\text{Ca}^{2+}]_e$  in *L. terraereginae*  
424 larvae despite the observation that acclimation to low pH was accompanied by an apparent net  
425 increase in  $\text{Ca}^{2+}$  uptake. If this effect was indeed the result of an increase in  $\text{Ca}^{2+}$  uptake and not a

426 reduction in efflux, then it is possible that it was facilitated by an increase in the activity of the  
427 existing channels as opposed to the de novo production of more channels. Likewise, the lack of  
428 increase in E-cadherin mRNA expression with chronic low pH exposure suggests that E-cadherin  
429 function was unaffected by low pH. E-cadherins bind  $\text{Ca}^{2+}$  from the extracellular environment; our  
430 data suggest that maintenance of the transcellular  $\text{Ca}^{2+}$  transport pathway allows for the  
431 maintenance of favourable  $\text{Ca}^{2+}$  concentrations in the extracellular space to prevent E-cadherin  
432 disfunction. Consistent with this idea, increased expression of calbindin mRNA in acid-acclimated  
433 larvae provides some evidence that increased transcellular  $\text{Ca}^{2+}$  transport plays a role in promoting  
434 extreme acid tolerance. Increased  $\text{Ca}^{2+}$  uptake at the apical membrane may be evidenced by  
435 increased intracellular  $\text{Ca}^{2+}$  shuttling rates (and an associated increased abundance of calbindin  
436 proteins) to maintain  $\text{Ca}^{2+}$ -dependent junction dynamics in low pH environments. The finding that  
437 low pH acclimated larvae upregulated calbindin mRNA and had a net  $\text{Ca}^{2+}$  influx supports a role for  
438 increased transcellular  $[\text{Ca}^{2+}]_e$  movement in facilitating acid tolerance in *L. terraereginae* larvae.  
439 However, mRNA expression levels do not always correlate well with actual levels of protein  
440 expression, so care must be taken when interpreting mRNA expression patterns in the absence of  
441 corresponding protein expression levels. Differential post-translational processing of mRNA and  
442 other factors can be responsible for the low correlation between an organism's transcriptome and  
443 its proteome (Ghazalpour et al., 2011; Marguerat et al., 2012). Although we cannot rule out a  
444 paracellular route for the uptake of  $\text{Ca}^{2+}$  into the extracellular space, studies in fish suggests that  
445 more than 97% of branchial (gills)  $\text{Ca}^{2+}$  uptake is active (transcellular) (Flik et al., 1995). The  
446 hormonal control of  $\text{Ca}^{2+}$  transport protein function and abundance is a potentially overlooked  
447 factor in understanding how branchial  $\text{Ca}^{2+}$  transport is influenced by extracellular pH and  $[\text{Ca}^{2+}]_e$   
448 in *L. terraereginae*.

449 This study showed that environmental  $\text{Ca}^{2+}$  has a protective effect on the control of  $\text{Na}^+$   
450 efflux at low pH in *L. terraereginae* larvae. Furthermore, it demonstrated that larvae have a  
451 capacity for acclimation to low pH via changes in  $\text{Na}^+$  and  $\text{Ca}^{2+}$  fluxes, which appear to involve the  
452 transcellular pathway (i.e. increased calbindin mRNA upregulation). Given that *L. terraereginae*  
453 larvae can maintain or increase  $\text{Ca}^{2+}$  uptake at low pH suggests that protonation of the branchial  
454 epithelium likely does not outwardly inhibit  $\text{Ca}^{2+}$  uptake. However, we only examined net  $\text{Na}^+$  and  
455  $\text{Ca}^{2+}$  fluxes which do not reveal details about the discrete behaviour of uptake and efflux  
456 pathways. The use of radioactive isotopes or fluorescent ion analogues could be used to better  
457 resolve changes in influx and efflux pathways and how they contribute to net ion fluxes. Inhibition

458 of apical  $\text{Ca}^{2+}$  uptake by ruthenium red strongly supports a role for the maintenance of  
459 transcellular  $\text{Ca}^{2+}$  uptake in the control of branchial junction stability at low pH in *L. terraereginae*  
460 but does not reveal the specific site of action for  $\text{Ca}^{2+}$  in preventing  $\text{Na}^+$  loss at low pH. Using  
461 intracellular  $\text{Ca}^{2+}$  markers to track  $\text{Ca}^{2+}$  movement during acclimation to low pH may help to  
462 elucidate this mechanism. As *L. terraereginae* larvae are exceptionally acid tolerant, their ability to  
463 maintain  $\text{Ca}^{2+}$  uptake in very soft and acidic waters may be a unique adaptation. Comparing  
464 transcellular  $\text{Ca}^{2+}$  transport capabilities with other acid-sensitive species might reveal the  
465 mechanistic adaptations employed by *L. terraereginae* in the maintenance of epithelial stability at  
466 low pH. The current study highlights a role for transcellular  $\text{Ca}^{2+}$  transport and the prevention of  
467  $\text{Ca}^{2+}$  uptake inhibition by low pH in the extreme acid tolerance of *L. terraereginae* larvae.

468

#### 469 **ACKNOWLEDGEMENTS**

470 Funding for this research was provided by the Australian Research Council (DP150101571) to CEF  
471 and was done under the UQ Animal Ethics Committee (Approval number: SBS/460/14/ARC). The  
472 authors thank Dr Edward Meyer for useful discussions during the project, Dr Nicholas Wu and  
473 Callum McKercher for assistance with gene expression studies.

474

#### 475 **COMPETING INTERESTS**

476 CEF is the Editor-in-Chief for JEB.

477

#### 478 **DATA AVAILABILITY**

479 The complete datasets and R scripts used for analysing the data is publicly available at UQ eSpace  
480 (<https://doi.org/10.14264/18c7301>)

481

#### 482 **AUTHOR CONTRIBUTIONS**

483 Conceptualisation: RLC, CH, CEF; Methodology: CH, RLC, CEF; Validation: CH; Formal analysis: CH;  
484 Investigation: CH; Resources: CEF; Data curation: CH; Writing – original draft: CH; Writing – review



485 & editing: CH, RLC, CEF; Visualisation: CH; Supervision: RLC, CEF; Project administration: RLC, CEF;

486 Funding acquisition: RLC, CEF.

487

488

489 **REFERENCES**

- 490 **Baldwin, G. F. and Bentley, P. J.** (1980). Calcium metabolism in bullfrog tadpoles (*Rana*  
491 *catesbeiana*). *J. Exp. Biol.* **88**, 357–365.
- 492 **Bayly, I. A.** (1964). Chemical and biological studies on some acidic lakes of east Australian sandy  
493 coastal lowlands. *Mar. Freshw. Res.* **15**, 56–72.
- 494 **Bhat, M., Toledo-Velasquez, D., Wang, L. Y., Malanga, C. J., Ma, J. K. H. and Rojanasakul, Y.**  
495 (1993). Regulation of tight junction permeability by calcium mediators and cell cytoskeleton in  
496 rabbit tracheal epithelium. *Pharm. Res. An Off. J. Am. Assoc. Pharm. Sci.* **10**, 991–997.
- 497 **Bindels, R. J. M., Hartog, A., Abrahamse, S. L. and Van Os, C. H.** (1994). Effects of pH on apical  
498 calcium entry and active calcium transport in rabbit cortical collecting system. *Am. J. Physiol. - Ren.*  
499 *Fluid Electrolyte Physiol.* **266**, F620–F627.
- 500 **Brown, R. C. and Davis, T. P.** (2002). Calcium modulation of adherens and tight junction function:  
501 A potential mechanism for blood-brain barrier disruption after stroke. *Stroke* **33**, 1706–1711.
- 502 **Cai, Q., Chandler, J. S., Wasserman, R. H., Kumar, R. and Penniston, J. T.** (1993). Vitamin D and  
503 adaptation to dietary calcium and phosphate deficiencies increase intestinal plasma membrane  
504 calcium pump gene expression. *Proc. Natl. Acad. Sci. U. S. A.* **90**, 1345–1349.
- 505 **Chasiotis, H., Kolosov, D., Bui, P. and Kelly, S. P.** (2012). Tight junctions, tight junction proteins  
506 and paracellular permeability across the gill epithelium of fishes: A review. *Respir. Physiol.*  
507 *Neurobiol.* **184**, 269–281.
- 508 **Christakos, S., Gabrielides, C. and Rhoten, W. B.** (1989). Vitamin D-dependent calcium binding  
509 proteins: Chemistry, distribution, functional considerations, and molecular biology. *Endocr. Rev.*  
510 **10**, 3–26.
- 511 **Clapham, D.** (2007). Calcium signaling. *Cell* **131**, 1047–1058.
- 512 **Cummins, C. P.** (1988). Effect of calcium on survival times of *Rana temporaria* embryos at low pH.  
513 *Funct. Ecol.* **2**, 397–302.
- 514 **D’Souza-Li, L.** (2006). The calcium-sensing receptor and related diseases. *Arq. Bras. Endocrinol.*  
515 *Metabol.* **50**, 628–639.

- 516 **Dalziel, T. R. K., Morris, R. and Brown, D. J. A.** (1986). The effects of low pH, low calcium  
517 concentrations and elevated aluminium concentrations on sodium fluxes in brown trout, *Salmo*  
518 *Trutta*. *Water Air Soil Pollut.* **30**, 569-577.
- 519 **Daye, P. G. and Garside, E. T.** (1976). Histopathologic changes in surficial tissues of brook trout,  
520 *Salvelinus fontinalis* (Mitchill), exposed to acute and chronic levels of pH. *Can. J. Zool.* **54**, 2140–  
521 2155.
- 522 **Eddy, F. B. and Bath, R. N.** (1979). Effects of lanthanum on sodium and chloride fluxes in the  
523 goldfish *Carassius auratus*. *J. Comp. Physiol.* **129**, 145–149.
- 524 **Edwards, S. L. and Marshall, W. S.** (2012). Principles and Patterns of Osmoregulation and  
525 Euryhalinity in Fishes. *Fish Physiol.* **32**, 1–44.
- 526 **Evans, D. H., Piermarini, P. M. and Potts, W. T. W.** (1999). Ionic transport in the fish gill  
527 epithelium. *J. Exp. Zool.* **283**, 641–652.
- 528 **Flik, G. and Verbost, P. M.** (1995). Cellular mechanisms in calcium transport and homeostasis in  
529 fish. *Biochem. Mol. Biol. Fishes* **5**, 251–263.
- 530 **Flik, G., Verbost, P. M. and Wendelaar Bonga, S. E.** (1995). Calcium transport processes in fishes.  
531 In *Fish Physiology 14B: Cellular and Molecular Approaches to Fish Ionic Regulation* (ed. Wood, C.  
532 M. and Shuttleworth, T. J.), pp. 317–342. San Diego: Academic Press.
- 533 **Fox, J. and Weisberg, S.** (2018). An R Companion to applied regression. 3rd ed. SAGE Publications.
- 534 **Freda, J. and Dunson, W. A.** (1984). Sodium balance of amphibian larvae exposed to low  
535 environmental pH. *Physiol. Zool.* **57**, 435–443.
- 536 **Freda, J. and McDonald, D. G.** (1988). Physiological correlates of interspecific variation in acid  
537 tolerance in fish. *J. Exp. Biol.* **136**, 243–258.
- 538 **Freda, J., Sanchez, D. A. and Bergman, H. L.** (1991). Shortening of branchial tight junction acid-  
539 exposed rainbow trout (*Oncorhynchus mykiss*). *Can. J. Fish. Aquat. Sci.* **48**, 2028–2033.
- 540 **Gascon, C., Planas, D. and Moreau, G.** (1987). The interaction of pH, calcium, and aluminium  
541 concentrations on the survival and development of wood frog (*Rana sylvatica*) eggs and tadpoles.  
542 *Ann. La Soc. R. Zool. Belgique* **117**, 189–199.

- 543 **Ghazalpour, A., Bennett, B., Petyuk, V. A., Orozco, L., Hagopian, R., Mungrue, I. N., Farber, C. R.,**  
544 **Sinsheimer, J., Kang, H. M., Furlotte, N., et al.** (2011). Comparative analysis of proteome and  
545 transcriptome variation in mouse. *PLoS Genet.* **7**, e1001393.
- 546 **Gonzalez-Mariscal, L., Contreras, R. G., Bolivar, J. J., Ponce, A., Chavez De Ramirez, B. and**  
547 **Cereijido, M.** (1990). Role of calcium in tight junction formation between epithelial cells. *Am. J.*  
548 *Physiol.* **259**, C978-C986.
- 549 **González-Mariscal, L., de Ramirez, B. C., Lázaro, A. and Cereijido, M.** (1989). Establishment of  
550 tight junctions between cells from different animal species and different sealing capacities. *J.*  
551 *Membr. Biol.* **107**, 43–56.
- 552 **Gonzalez, R. J. and Dunson, W. A.** (1989). Acclimation of sodium regulation to low pH and the role  
553 of calcium in the acid-tolerant sunfish *Enneacanthus obesus*. *Physiol. Zool.* **62**, 977–992.
- 554 **Gonzalez, R. J., Dalton, V. M. and Patrick, M. L.** (1997). Ion regulation in ion-poor acidic water by  
555 the blackskirt tetra (*Gymnocorymbus ternetzi*), a fish native to the Amazon River. *Physiol. Zool.* **70**,  
556 428–435.
- 557 **Gonzalez, R. J., Wood, C. M., Wilson, R. W., Patrick, M. L., Bergman, H. L., Narahara, A. and Val,**  
558 **A. L.** (1998). Effects of water pH and calcium concentration on ion balance in fish of the Rio Negro,  
559 Amazon. *Physiol. Zool.* **71**, 15–22.
- 560 **Gosner, K.** (1960). A simplified table for staging anuran embryos and larvae with notes on  
561 identification. *Herpetologica* **16**, 183–190.
- 562 **Gumbiner, B., Stevenson, B. and Grimaldi, A.** (1988). The role of the cell adhesion molecule  
563 uvomorulin in the formation and maintenance of the epithelial junctional complex. *J. Cell Biol.* **107**,  
564 1575–1587.
- 565 **Hajnóczky, G., Csordás, G., Das, S., Garcia-Perez, C., Saotome, M., Sinha Roy, S. and Yi, M.** (2006).  
566 Mitochondrial calcium signalling and cell death: Approaches for assessing the role of  
567 mitochondrial Ca<sup>2+</sup> uptake in apoptosis. *Cell Calcium* **40**, 553–560.
- 568 **Hartsock, A. and Nelson, W. J.** (2008). Adherens and tight junctions: Structure, function and  
569 connections to the actin cytoskeleton. *Biochim. Biophys. Acta* **1778**, 660–669.
- 570 **Hines, H. and Meyer, E.** (2011). The frog fauna of Bribie Island: An annotated list and comparison  
571 with other Queensland dune islands. *Proc. R. Soc. Queensl.* **117**, 261–274.

- 572 **Hoenderop, J. G. J., Van Der Kemp, A. W. C. M., Hartog, A., Van Os, C. H., Willems, P. H. G. M.**  
573 **and Bindels, R. J. M.** (1999). The epithelial calcium channel, ECaC, is activated by hyperpolarization  
574 and regulated by cytosolic calcium. *Biochem. Biophys. Res. Commun.* **261**, 488–492.
- 575 **Jalili, V., Afgan, E., Gu, Q., Clements, D., Blankenberg, D., Goecks, J., Taylor, J. and Nekrutenko,**  
576 **A.** (2020). The Galaxy platform for accessible, reproducible and collaborative biomedical analyses:  
577 2020 update. *Nucleic Acids Res.* **48**, W395–W402.
- 578 **Kelly, S. P. and Wood, C. M.** (2008). Cortisol stimulates calcium transport across cultured gill  
579 epithelia from freshwater rainbow trout. *Vitr. Cell. Dev. Biol.* **44**, 96–104.
- 580 **Khanal, R. C. and Nemere, I.** (2008). Regulation of intestinal calcium transport. *Annu. Rev. Nutr.*  
581 **28**, 179–196.
- 582 **Kullberg, A., Bishop, K. H., Hargeby, A., Jansson, M. and Petersen, R. C.** (1993). The ecological  
583 significance of dissolved organic carbon in acidified waters. *Ambio* **22**, 331–337.
- 584 **Kumai, Y., Bahubeshi, A., Steele, S. and Perry, S. F.** (2011). Strategies for maintaining Na<sup>+</sup> balance  
585 in zebrafish (*Danio rerio*) during prolonged exposure to acidic water. *Comp. Biochem. Physiol.* **160**,  
586 52–62.
- 587 **Kwong, R. W. M., Kumai, Y. and Perry, S. F.** (2014). The physiology of fish at low pH: The zebrafish  
588 as a model system. *J. Exp. Biol.* **217**, 651–662.
- 589 **Lacaz-Vieira, F. and Marques, M. M.** (2004). Lanthanum effect on the dynamics of tight junction  
590 opening and closing. *J. Membr. Biol.* **202**, 39–49.
- 591 **Lenth, R.** (2022). Emmeans: Estimated marginal means, aka least-square means. R package version  
592 1.7.3. <https://CRAN.R-project.org/package=emmeans>.
- 593 **Ma, T. Y., Tran, D., Hoa, N., Nguyen, D., Merryfield, M. and Tarnawski, A.** (2000). Mechanism of  
594 extracellular calcium regulation of intestinal epithelial tight junction permeability: Role of  
595 cytoskeletal involvement. *Microsc. Res. Tech.* **51**, 156–168.
- 596 **Marguerat, S., Schmidt, A., Codlin, S., Chen, W., Aebersold, R. and Bähler, J.** (2012). Quantitative  
597 analysis of fission yeast transcriptomes and proteomes in proliferating and quiescent cells. *Cell*  
598 **151**, 671–683.

- 599 **Matsuo, A. Y. and Val, A. L.** (2002). Low pH and calcium effects on net Na<sup>+</sup> and K<sup>+</sup> fluxes in two  
600 catfish species from the Amazon River (Corydoras: Callichthyidae). *Brazilian J. Med. Biol. Res.* **35**,  
601 361–367.
- 602 **Mcdonald, D. G.** (1983). The interaction of environmental calcium and low pH on the physiology of  
603 the rainbow trout, *Salmo gairdneri*: I. Branchial and renal net ion and H<sup>+</sup> Fluxes. *J. Exp. Biol.* **102**,  
604 123-140.
- 605 **McDonald, D. G. and Rogano, M. S.** (1986). Ion regulation by the rainbow trout, *Salmo gairdneri*,  
606 in ion-poor water. *Physiol. Zool.* **59**, 318–331.
- 607 **McDonald, D. G., Walker, R. L. and Wilkes, P. R. H.** (1983). The interaction of environmental  
608 calcium and low pH on the physiology of the rainbow trout, *Salmo Gairdneri* II. Branchial  
609 ionoregulatory mechanisms. *J. Exp. Biol.* **102**, 141–155.
- 610 **McDonald, D. G., Ozog, J. L. and Simons, B. P.** (1984). The influence of low pH environments on  
611 ion regulation in the larval stages of the anuran amphibian, *Rana clamitans*. *Can. J. Zool.* **62**, 2171–  
612 2177.
- 613 **McWilliams, P. G.** (1983). An investigation of the loss of bound calcium from the gills of the brown  
614 trout, *Salmo trutta*, in acid media. *Comp. Biochem. Physiol.* **74**, 107–116.
- 615 **Meyer, E.** (2004). Acid adaptation and mechanisms for softwater acid tolerance in larvae of anuran  
616 species native to the “Wallum” of east Australia. *PhD thesis*, University of Queensland, St Lucia,  
617 Australia.
- 618 **Meyer, E. A., Cramp, R. L. and Franklin, C. E.** (2010). Damage to the gills and integument of *Litoria*  
619 fallax larvae (Amphibia: Anura) associated with ionoregulatory disturbance at low pH. *Comp.*  
620 *Biochem. Physiol.* **155**, 164–171.
- 621 **Meyer, E. A., Franklin, C. E. and Cramp, R. L.** (2020). Physiological and morphological correlates of  
622 extreme acid tolerance in larvae of the acidophilic amphibian *Litoria cooloolensis*. *J. Comp. Physiol.*  
623 *B* 191, 159–171.
- 624 **Nilius, B., Prenen, J., Vennekens, R., Hoenderop, J. G. J., Bindels, R. J. M. and Droogmans, G.**  
625 (2001). Pharmacological modulation of monovalent cation currents through the epithelial Ca<sup>2+</sup>  
626 channel ECac1. *Br. J. Pharmacol.* **134**, 453–462.

- 627 **O’Keefe, E. J., Briggaman, R. A. and Herman, B.** (1987). Calcium-induced assembly of adherens  
628 junctions in keratinocytes. *J. Cell Biol.* **105**, 807–817.
- 629 **Perkins, J. R., Dawes, J. M., McMahon, S. B., Bennett, D. L. H., Orengo, C. and Kohl, M.** (2012).  
630 ReadqPCR and NormqPCR: R packages for the reading, quality checking and normalisation of RT-  
631 qPCR quantification cycle (Cq) data. *BMC Genomics* **13**, 296.
- 632 **Pfaffl, M. W.** (2001). A new mathematical model for relative quantification in real-time RT-PCR.  
633 *Nucleic Acids Res.* **29**, e45.
- 634 **Pokutta, S., Herrenknecht, K., Kemler, R. and Engel, J.** (1994). Conformational changes of the  
635 recombinant extracellular domain of E-cadherin upon calcium binding. *Eur. J. Biochem.* **223**, 1019–  
636 1026.
- 637 **R Computing Team** (2021). A language and environment for statistical computing. R Foundation  
638 for Statistical Computing, Vienna, Austria. URL <https://www.R-project.org/>.
- 639 **Ramlochansingh, C., Branoner, F., Chagnaud, B. P. and Straka, H.** (2014). Efficacy of tricaine  
640 methanesulfonate (MS-222) as an anesthetic agent for blocking sensory-motor responses in  
641 *Xenopus laevis* tadpoles. *PLoS One* **9**, e101606.
- 642 **Reid, S. D., McDonald, D. G. and Rhem, R. R.** (1991). Acclimation to sublethal aluminum:  
643 modifications of metal – gill surface interactions of juvenile rainbow trout (*Oncorhynchus mykiss*).  
644 *Can. J. Fish. Aquat. Sci.* **48**, 1996–2005.
- 645 **Riesch, R., Tobler, M. and Plath, M.** (2015). *Extremophile fishes: Ecology, Evolution, and*  
646 *Physiology of Teleosts in Extreme Environments*. Switzerland: Springer.
- 647 **Robinson, G. D.** (1993). Effects of Reduced Ambient pH on Sodium Balance in the Red-Spotted  
648 Newt, *Notophthalmus viridescens*. *Physiol. Zool.* **66**, 602–618.
- 649 **Rocha-Martins, M., Njaine, B. and Silveira, M. S.** (2012). Avoiding pitfalls of internal controls:  
650 Validation of reference genes for analysis by qRT-PCR and western blot throughout rat retinal  
651 development. *PLoS One* **7**, e43028.
- 652 **Rosseland, B. O. and Staurnes, M.** (1994). Physiological mechanisms for toxic effects and  
653 resistance to acid water: an ecophysiological and ecotoxicological approach. In *Acidification of*  
654 *Freshwater Ecosystems: Implications for the Future* (ed. Steinberg, W. C. E. and Wright, R. F.), pp.  
655 227–246. London, UK: John Wiley and Sons.

- 656 **Schneeberger, E. E. and Lynch, R. D.** (1992). Structure, function, and regulation of cellular tight  
657 junctions. *Am. J. Physiol.* **262**, L647-661.
- 658 **Schneeberger, E. E. and Lynch, R. D.** (2004). The tight junction: A multifunctional complex. *Am. J.*  
659 *Physiol.* **286**, C1213-C1228.
- 660 **Shahsavarani, A. and Perry, S. F.** (2006). Hormonal and environmental regulation of epithelial  
661 calcium channel in gill of rainbow trout (*Oncorhynchus mykiss*). *Am. J. Physiol* **291**, R1490-R1498.
- 662 **Stuart, R. O., Sun, A., Bush, K. T. and Nigam, S. K.** (1996). Dependence of epithelial intercellular  
663 junction biogenesis on thapsigargin-sensitive intracellular calcium stores. *J. Biol. Chem.* **271**,  
664 13636–13641.
- 665 **Thiers, R. E. and Hviid, K.** (1962). Interference-free flame photometry of calcium in serum and  
666 urine. *Clin. Chem.* **8**, 35–46.
- 667 **Vandesompele, J., De Preter, K., Pattyn, F., Poppe, B., Van Roy, N., De Paepe, A. and Speleman,**  
668 **F.** (2002). Accurate normalization of real-time quantitative RT-PCR data by geometric averaging of  
669 multiple internal control genes. *Genome Biol.* **3**, research0034.1.
- 670 **Vennekens, R., Prenen, J., Hoenderop, J. G. J., Bindels, R. J. M., Droogmans, G. and Nilius, B.**  
671 (2001). Modulation of the epithelial Ca<sup>2+</sup> channel ECaC by extracellular pH. *Pflugers Arch. Eur. J.*  
672 *Physiol.* **442**, 237–242.
- 673 **Verbost, P. M., Flik, G., Fenwick, J. C., Greco, A. M., Pang, P. K. T. and Wendelaar Bonga, S. E.**  
674 (1993). Branchial calcium uptake: possible mechanisms of control by stanniocalcin. *Fish Physiol.*  
675 *Biochem.* **11**, 205–215.
- 676 **Vincent, F. and Duncton, M. A.** (2011). TRPV4 Agonists and Antagonists. *Curr. Top. Med. Chem.* **11**,  
677 2216–2226.
- 678 **Volberg, T., Geiger, B., Kartenbeck, J. and Franke, W. W.** (1986). Changes in membrane-  
679 microfilament interaction in intercellular adherens junctions upon removal of extracellular Ca<sup>2+</sup>  
680 ions. *J. Cell Biol.* **102**, 1832–1842.
- 681 **Watabe-Uchida, M., Uchida, N., Imamura, Y., Nagafuchi, A., Fujimoto, K., Uemura, T.,**  
682 **Vermeulen, S., Van Roy, F., Adamson, E. D. and Takeichi, M.** (1998).  $\alpha$ -Catenin-vinculin  
683 interaction functions to organize the apical junctional complex in epithelial cells. *J. Cell Biol.* **142**,  
684 847–857.



- 685 **Welch, M. W., Hamar, D. W. and Fettman, M. J.** (1990). Method comparison for calcium  
686 determination by flame atomic absorption spectrophotometry in the presence of phosphate. *Clin.*  
687 *Chem.* **36**, 351–354.
- 688 **Weng, L., Dai, H., Zhan, Y., He, Y., Stepaniants, S. B. and Bassett, D. E.** (2006). Rosetta error  
689 model for gene expression analysis. *Bioinformatics* **22**, 1111–1121.
- 690 **West, M. R., Ferguson, D. J. P., Hart, V. J., Sanjar, S. and Man, Y.** (2002). Maintenance of the  
691 epithelial barrier in a bronchial epithelial cell line is dependent on functional E-cadherin local to  
692 the tight junctions. *Cell Commun. Adhes.* **9**, 29–44.
- 693 **Wongdee, K. and Charoenphandhu, N.** (2013). Regulation of epithelial calcium transport by  
694 prolactin: From fish to mammals. *Gen. Comp. Endocrinol.* **181**, 235–240.
- 695 **Yu, A. S. L., Cheng, M. H. and Coalson, R. D.** (2010). Calcium inhibits paracellular sodium  
696 conductance through claudin-2 by competitive binding. *J. Biol. Chem.* **285**, 37060–37069.
- 697 **Zhang, Y., Sivasankar, S., Nelson, W. J. and Chu, S.** (2009). Resolving cadherin interactions and  
698 binding cooperativity at the single-molecule level. *Proc. Natl. Acad. Sci. U. S. A.* **106**, 109–114.
- 699
- 700

701 **TABLES**

702 **Table 1. Ion concentrations (in  $\mu\text{mol L}^{-1}$ ) in three  $[\text{Ca}^{2+}]_e$  ASW treatments used for acclimation**  
703 **and exposure.** Distilled water plus:

704  $5 \mu\text{mol L}^{-1} [\text{Ca}^{2+}]_e = (\text{in } \mu\text{mol L}^{-1}) 5 \text{ CaCl}_2 \cdot 7\text{H}_2\text{O}, 40 \text{ MgSO}_4 \cdot 7\text{H}_2\text{O}, 490 \text{ NaCl}, 23 \text{ NaOH}, 20 \text{ KCl};$

705  $50 \mu\text{mol L}^{-1} [\text{Ca}^{2+}]_e = (\text{in } \mu\text{mol L}^{-1}) 50 \text{ CaCl}_2 \cdot 7\text{H}_2\text{O}, 40 \text{ MgSO}_4 \cdot 7\text{H}_2\text{O}, 400 \text{ NaCl}, 113 \text{ NaOH}, 20 \text{ KCl};$  and

706  $250 \mu\text{mol L}^{-1} [\text{Ca}^{2+}]_e = (\text{in } \mu\text{mol L}^{-1}) 250 \text{ CaCl}_2 \cdot 7\text{H}_2\text{O}, 40 \text{ MgSO}_4 \cdot 7\text{H}_2\text{O}, 513 \text{ NaOH}, 20 \text{ KCl}.$

| $[\text{Ca}^{2+}]$ | $[\text{Na}^+]$ | $[\text{Cl}^-]$ | $[\text{Mg}^{2+}]$ | $[\text{K}^+]$ |
|--------------------|-----------------|-----------------|--------------------|----------------|
| 5                  | 513             | 520             | 40                 | 20             |
| 50                 | 513             | 520             | 40                 | 20             |
| 250                | 513             | 520             | 40                 | 20             |

707

708

709 **FIGURES**

710

711

712

713

714

715

716

717

718

719

720

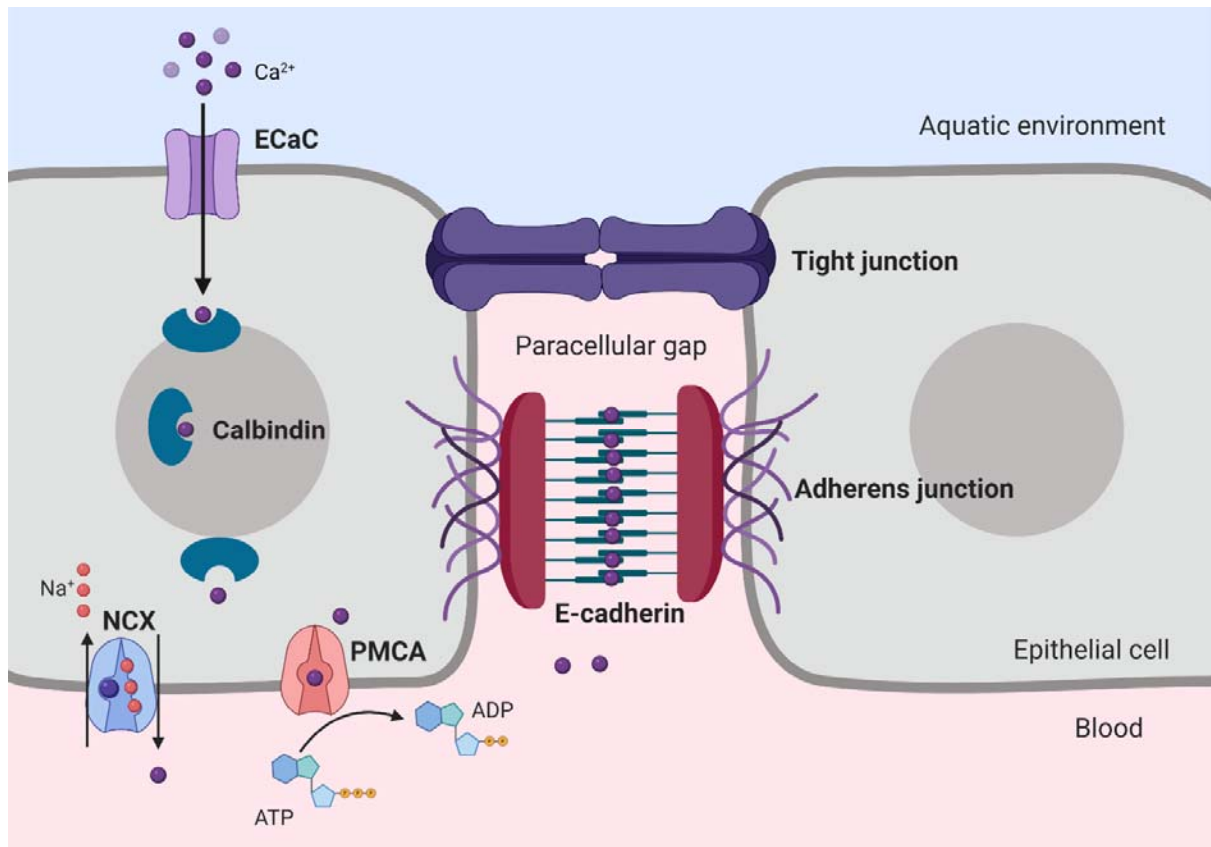

721 **Fig. 1 Proposed model of epithelial  $\text{Ca}^{2+}$  uptake and cell-cell adhesion in freshwater amphibian**

722 **larvae ionocytes.**  $\text{Ca}^{2+}$  is absorbed through the apical  $\text{Ca}^{2+}$  channel (ECaC) and extrusion through

723 basolateral  $\text{Ca}^{2+}$  transporters (NCX and PMCA) is facilitated and buffered by intracellular  $\text{Ca}^{2+}$

724 binding proteins (such as calbindin). Epithelial ionocytes are bound by the junctional complex

725 consisting of tight junctions, and more basal adherens junctions which are  $\text{Ca}^{2+}$ -dependent and

726 regulate tight junction structure and function.

727

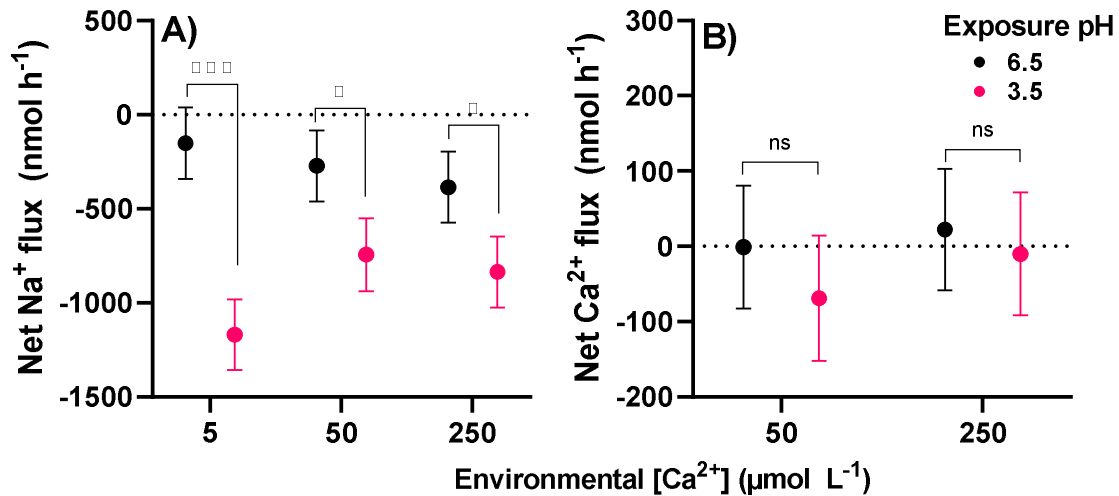

728  
729

730 **Fig. 2 Net Na<sup>+</sup> (A) and Ca<sup>2+</sup> (B) fluxes in response to low pH following acute (experiment 1)**  
731 **exposure to varying environmental Ca<sup>2+</sup> concentrations ([Ca<sup>2+</sup>]<sub>e</sub>) in *L. terraereginae* larvae.** N =  
732 12 larvae within each treatment group in experiment 1 were reared in 50 µmol L<sup>-1</sup> [Ca<sup>2+</sup>]<sub>e</sub> and  
733 acutely exposed to low pH at either 5, 50, and 250 µmol L<sup>-1</sup> [Ca<sup>2+</sup>]<sub>e</sub>. Points indicate the estimated  
734 marginal means adjusted for body mass, and error bars represent 95% confidence intervals for the  
735 fitted models. Positive net flux indicates a net ionic influx, whereas negative net flux indicates a  
736 net ionic efflux.

737

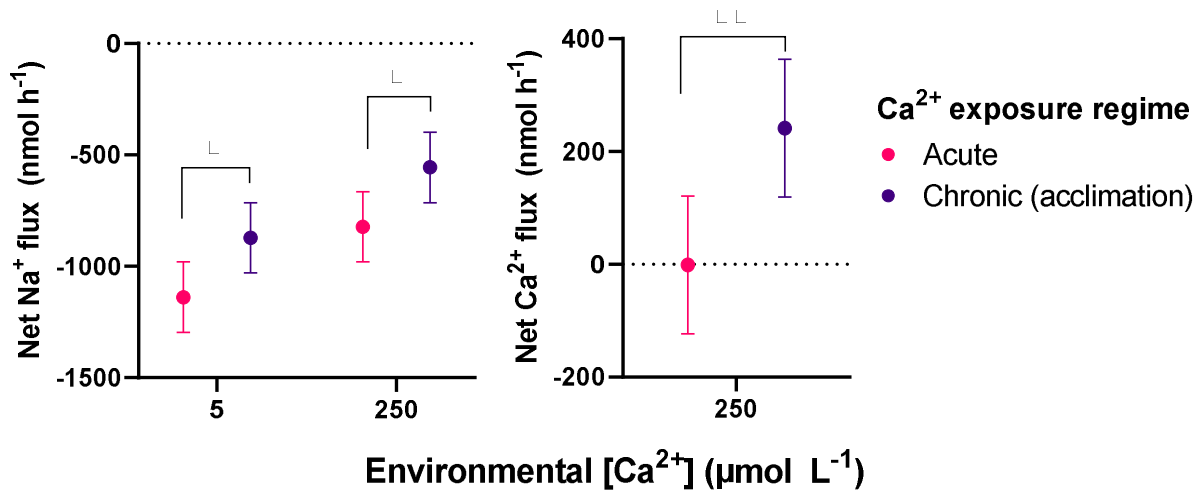

738  
739

740 **Fig. 3 The effect of acute or chronic exposure to low and high environmental Ca<sup>2+</sup> concentrations**  
741 **([Ca<sup>2+</sup>]<sub>e</sub>) on whole animal Na<sup>+</sup> and Ca<sup>2+</sup> fluxes following acute exposure to low pH.** N = 12 larvae  
742 within each treatment group in experiment 1 reared in 50 µmol L<sup>-1</sup> [Ca<sup>2+</sup>]<sub>e</sub> and acutely exposed to  
743 low pH at either 5 or 250 µmol L<sup>-1</sup> [Ca<sup>2+</sup>]<sub>e</sub> were compared to n = 12 larvae within each treatment  
744 group in experiment 2 reared in 5 or 250 µmol L<sup>-1</sup> [Ca<sup>2+</sup>]<sub>e</sub> and acutely exposed to low pH at  
745 equimolar [Ca<sup>2+</sup>]<sub>e</sub>. Points indicate the estimated marginal means adjusted for body mass, and error  
746 bars represent 95% confidence intervals for the fitted models. Positive net flux indicates a net  
747 ionic influx, whereas negative net flux indicates a net ionic efflux.

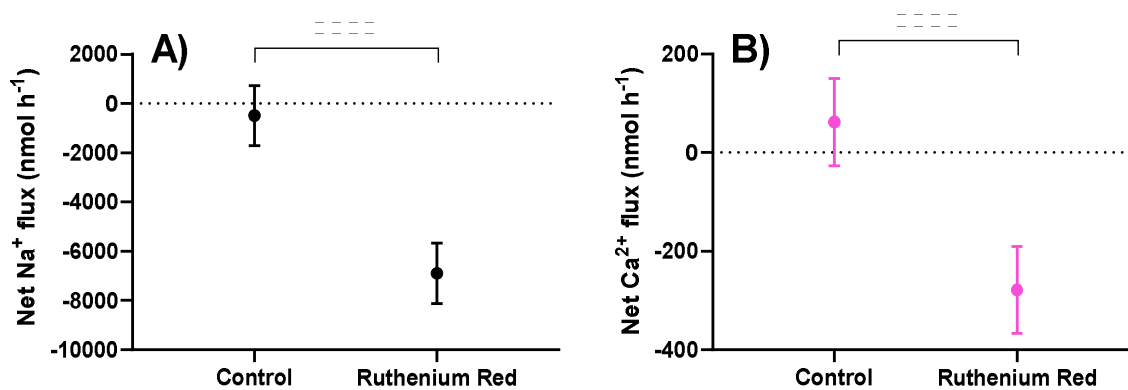

748

749 **Fig. 4 Net Na<sup>+</sup> (A) and Ca<sup>2+</sup> (B) fluxes in N = 12 *L. terraereginae* larvae within each group reared**  
750 **at pH 3.5 with 50 μmol L<sup>-1</sup> environmental Ca<sup>2+</sup> concentration ([Ca<sup>2+</sup>]<sub>e</sub>), acutely exposed 10 μmol**  
751 **L<sup>-1</sup> RR at pH 3.5.** Points indicate the estimated marginal means adjusted for mass, and error bars  
752 represent 95% confidence intervals for the fitted model. Net Na<sup>+</sup> and Ca<sup>2+</sup> fluxes were significantly  
753 higher in *L. terraereginae* acutely exposed to 10 μmol L<sup>-1</sup> ruthenium red for 6 h.

754

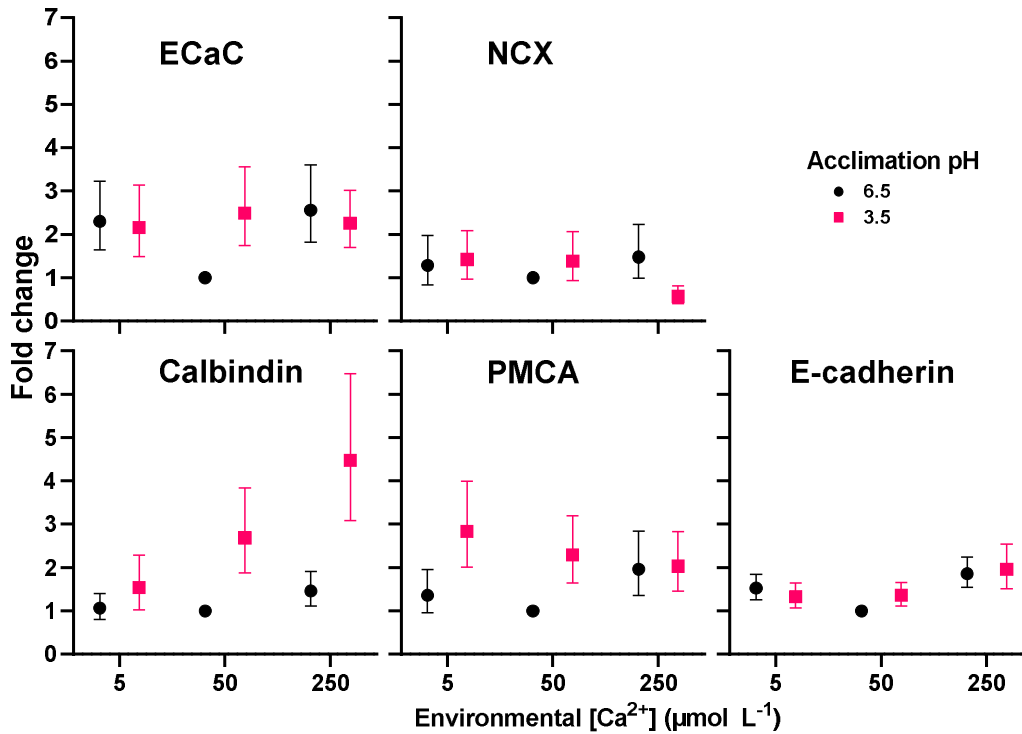

755

756 **Fig 5 Expression of five key  $\text{Ca}^{2+}$  transport genes in N = 6 *L. terraereginae* larvae per group reared**  
757 **in circumneutral and low pH ASW containing 5, 50, and 250  $\mu\text{mol L}^{-1}$  environmental  $\text{Ca}^{2+}$**   
758 **concentration ( $[\text{Ca}^{2+}]_e$ ).** Change in expression is represented as fold change made relative to the  
759 pH 6.5, 50  $\mu\text{mol L}^{-1}$   $[\text{Ca}^{2+}]_e$  control treatment group. Points indicate mean fold change and error  
760 bars indicate standard error using a Taylor series (Weng et al., 2006).
